# Supplementary material
Source: PubMed Central journal article supplement (PMC3756936)
Supplement: NIHMS479334-supplement-1_si_001.pdf [file NIHMS479334-supplement-1_si_001.pdf]

## Supporting Information

### Optimization of benzoxazole-based inhibitors of *Cryptosporidium parvum* inosine 5'-monophosphate dehydrogenase

*Suresh Kumar Gorla, Mandapati Kavitha, Minjia Zhang, James En Wai Chin, Xiaoping Liu, Boris Striepen, Magdalena Makowska-Grzyska, Youngchang Kim, Andrzej Joachimiak, Lizbeth Hedstrom, Gregory D. Cuny*

#### Supporting Information Table of Contents

|                                                                 |       |
|-----------------------------------------------------------------|-------|
| Table S1: Statistics for data collection and refinement         | p. S2 |
| Determination of microsomal stability in mouse liver microsomes | p. S3 |
| Determination of cytotoxicity in mammalian cell lines           | p. S3 |
| Table S2: Cytotoxicity evaluation against mammalian cell lines  | p. S3 |

**Table S1:** Statistics for data collection and refinement

|                                                       |                                                                                  |
|-------------------------------------------------------|----------------------------------------------------------------------------------|
| <b>DATA COLLECTION</b>                                |                                                                                  |
| X-ray wavelength (Å)                                  | 0.97923                                                                          |
| Temperature (°K)                                      | 100                                                                              |
| Space group                                           | P2 <sub>1</sub>                                                                  |
| Unit cell (Å, °)                                      | $a = 89.19, b = 92.02, c = 92.14,$<br>$\alpha = 90, \beta = 103.85, \gamma = 90$ |
| Resolution (Å)                                        | 2.10                                                                             |
| Total no. of reflections                              | 83034                                                                            |
| No. of unique reflections                             | 83034                                                                            |
| $\langle I/\sigma(I) \rangle$                         | 8.2                                                                              |
| Completeness of data (%)                              | 99.2                                                                             |
| $R_{\text{merge}}^a$ (%)                              | 11.9                                                                             |
| <b>REFINEMENT</b>                                     |                                                                                  |
| Resolution range (Å)                                  | 35.5-2.1                                                                         |
| Reflections used (working/free)                       | 78768/4141                                                                       |
| $R_{\text{work}}/R_{\text{free}}^b$ (%)               | 16.2/21.0                                                                        |
| Total number of non-hydrogen atoms in asymmetric unit | 10776                                                                            |
| R.m.s. deviations from ideal geometry                 |                                                                                  |
| Bond length (Å)                                       | 0.007                                                                            |
| Bond angles (deg)                                     | 1.104                                                                            |
| Mean B value (Å <sup>2</sup> )                        | 36.9                                                                             |
| PDB accession code                                    | 4IXH                                                                             |

<sup>a</sup> $R_{\text{merge}} = \frac{\sum_{hkl} \sum_i |I_i(hkl) - \langle I(hkl) \rangle|}{\sum_{hkl} \sum_i \langle I_i(hkl) \rangle}$ , expressed as %, where  $I_i(hkl)$  is the intensity for the  $i$ th measurement of an equivalent reflection with indices  $h, k$ , and  $l$ .

<sup>b</sup> $R = \frac{\sum_{hkl} ||F_{\text{obs}}| - |F_{\text{calc}}||}{\sum_{hkl} |F_{\text{obs}}|}$ , expressed as %, where  $F_{\text{obs}}$  and  $F_{\text{calc}}$  are observed and calculated factors, respectively.  $R_{\text{free}}$  is calculated analogously for the test reflections, which were randomly selected and excluded from refinement.

**Determination of microsomal stability in mouse liver microsomes.** The test agent (1 – 3  $\mu\text{M}$ ) was incubated in duplicate with microsomes at 37 °C. The reaction contained microsomal protein in 100 mM potassium phosphate, 2 mM NADPH, 3 mM  $\text{MgCl}_2$  and pH 7.4. A control was run for each test agent omitting NADPH to detect NADPH-free degradation. Aliquots were removed at various time points from each experimental and control reaction and mixed with an equal volume of ice-cold Stop Solution (0.3% acetic acid in acetonitrile containing haloperidol, diclofenac, or other internal standard). Stopped reactions were incubated at least ten minutes at -20 °C, and an additional volume of water was added. The samples were centrifuged to remove precipitated protein, and the supernatants were analyzed by LC/MS/MS to quantitate the remaining parent. Data were converted to % remaining by dividing by the time zero concentration value. Data were fit to a first-order decay model to determine half-life.

**Determination of cytotoxicity in mammalian cell lines.** HeLa, HEK293, COS and CHO cells were diluted to a concentration of  $5 \times 10^4$  cells/mL in growth medium. Cell suspensions (100  $\mu\text{L}$ ) were added to 100  $\mu\text{L}$  of DMEM and varying concentrations of compounds in a 96 well flat-bottom plate (Corning). Bortezomib was used as positive control for cytotoxicity. Additional controls included “no compound” and “medium only” wells. Each concentration was tested in triplicate. Plates were incubated at 37 °C with 5%  $\text{CO}_2$  for 3 d. Media (100  $\mu\text{L}$ ) was removed, and the remaining sample was treated with 10  $\mu\text{L}$  of 10X alamarBlue® solution (Invitrogen) and processed as recommended by the manufacturer.

**Table S2:** Cytotoxicity evaluation against mammalian cell lines.  $\text{LD}_{50}$  values in  $\mu\text{M}$ . ND = not determined.

| <b>Compound</b> | <b>HeLa</b> | <b>HEK293</b> | <b>COS</b> | <b>CHO</b> |
|-----------------|-------------|---------------|------------|------------|
| <b>15a</b>      | >50         | >50           | >50        | >50        |
| <b>40a</b>      | >50         | >50           | >50        | >50        |
| <b>41</b>       | >50         | 12.5          | >50        | >50        |
| <b>44</b>       | >50         | >50           | >50        | >50        |
| <b>46</b>       | >50         | ND            | >50        | >50        |
| <b>57</b>       | >50         | >50           | >50        | >50        |
